# Supplementary material for: SKiM - A generalized literature-based discovery system for uncovering novel biomedical knowledge from PubMed
Source: Research Square preprint supplement (doi:10.21203/rs.3.rs-90043/v1), 2020-11-09
Supplement: Supplementary file 5 [file 48efa98225761d9a87f3d446.docx]

**Description of Additional Supplementary Files**

File Name: Supplementary Data 1

Description: Performance of SKiM and KinderMiner on six discoveries by Swanson and his colleagues. For discoveries by Swanson and his colleagues, we report all phenotypes and symptoms associated with A and C terms. However, only top 29 phenotypes and symptoms are sufficient to uncover all six discoveries by Swanson and his colleagues.

File Name: Supplementary Data 2

Description: The expert curated DDAs predicted by SKiM and KinderMiner for RD, migraine, AD and schizophrenia at cut-off date one year prior to the discoveries by Swanson and his colleagues. SKiM uncovered many expert curated DDAs when compared to KinderMiner. Certain expert curated DDAs are validated by clinical trials before the cut-off date (positive controls). Certain expert curated DDAs are validated by clinical trials after the cut-off date. Certain expert curated DDAs are not yet validated by clinical trials.

File Name: Supplementary Data 3

Description: Precision@20 at cut-off date one year prior to the discoveries by Swanson and his colleagues. Evaluation is based on DDA (E1 in Supplementary Data 3 and Fig. 3), DDA and manual analysis on retrieving at least one PubMed article showing association between A and C terms (E2 in Supplementary Data 3 and Fig. 3), DDA and manual analysis on retrieving at one PubMed article showing association between A and B terms, and B and C terms (E3 in Supplementary Data 3 and Fig. 3). SKiM uncovered C terms prior to first clinical trial published in PubMed and first co-occurrence of A and C terms in a PubMed abstract. Here, A represents a condition, B represents a phenotype/symptom, and C represents a drug.

File Name: Supplementary Data 4

Description: Performance of SKiM on the expert curated DDAs for multiple diseases. SKiM failed to predict Ginkgo biloba for RD, memantine and venlafaxine hydrochloride for migraine, and minocycline for schizophrenia. Ginkgo biloba achieved the lowest FET p-value of 0.2418 and the associated phenotype/symptom is obstruction. Memantine achieved the lowest FET p-value of 9.98×10-05 and the associated phenotype/symptom is seizures. Minocycline achieved the lowest FET p-value of 0.0525 and the associated phenotype/symptom is anomaly. Venlafaxine hydrochloride does not co-occur with top 50 phenotypes and synonyms.

File Name: Supplementary Data 5

Description: The expert curated DDAs missed by SKiM. SKiM missed to predict three expert curated DDAs for RD, 22 expert curated DDAs for migraine, 18 expert curated DDAs for AD and 19 expert curated DDAs for schizophrenia at the cut-off date one year prior to the discoveries by Swanson and his colleagues. Among these, two expert curated DDAs for RD, eight expert curated DDAs for migraine, seven expert curated DDAs for AD and nine expert curated DDAs for schizophrenia achieved FET p-value between 0.0002 and 0.9999. One expert curated DDA for RD, 13 expert curated DDAs or migraine, 11 expert curated DDAs for AD and 10 expert curated DDAs for schizophrenia are not reported with FET p-value because they co-occur with phenotypes and symptoms in less than two PubMed abstracts. SKiM is restricted to process co-occurring A and B, or B and C at least in two PubMed abstracts.

File Name: Supplementary Data 6

Description: Performance of SKiM on active ingredients from FDA approved drugs for migraine, AD and schizophrenia. All FDA approved drugs are not in DDA. Among 39 active ingredients from FDA approved drugs for migraine, AD and schizophrenia, SKiM uncovered 22 drugs at cut-off date one year prior to the discoveries by Swanson and his colleagues, and 35 drugs at cut-off date March 2019. SKiM uncovered drugs up to 32 years prior to approval by FDA, up to 31 years prior to validation by clinical trials published in PubMed, up to 16 years before the first mention of the usefulness of the drug in the literature, and up to 32 years prior to first co-occurrence of a condition and a drug in a PubMed abstract.

File Name: Supplementary Data 7

Description: New drug candidates uncovered by SKiM at cut-off date March 2019 for RD, migraine, AD and schizophrenia. Manual analysis on top 20 drugs confirmed the prediction of many drugs known for treating a condition (positive control), new potential drugs uncovered only by A→Bs→Cs and false positives. We provided evidence (i.e. PubMed or other resources) for known drugs uncovered by SKiM (see Manual curation – A-C).

­

File Name: Supplementary Data 8

Description: New drug candidates uncovered by SKiM at cut-off date March 2019 for 22 conditions. Manual analysis on top 20 drugs confirmed the prediction of many drugs known for treating a condition (positive control), new potential drugs uncovered only by A→Bs→Cs and false positives. We provided evidence (i.e. PubMed or other resources) for known drugs uncovered by SKiM (see Manual curation – A-C).
