# Supplementary material for: SKiM - A generalized literature-based discovery system for uncovering novel biomedical knowledge from PubMed
Source: Research Square preprint supplement (doi:10.21203/rs.3.rs-90043/v1), 2020-11-09
Supplement: Supplementary file 12 [file 30ff657031a22f0b155c608a.docx]

**Table 1.** Performance of SKiM and KinderMiner on the DDA

| **Disease** | **Cut-off date** | **DDA** | **KinderMiner** | | | | | | **SKiM** | | | | | |
| --- | --- | --- | --- | --- | --- | --- | --- | --- | --- | --- | --- | --- | --- | --- |
| **TP** | **FP** | **FN** | **R** | **P** | **P@20** | **TP** | **FP** | **FN** | **R** | **P** | **P@20** |
| RD | 1985 | 18 | 6 | 31 | 12 | **0.3333** | 0.1935 | **0.5789** | 15 | 1,604 | 3 | **0.8333** | 0.0094 | **0.5882** |
| migraine | 1987 | 89 | 18 | 46 | 71 | **0.2022** | 0.3913 | **0.7000** | 67 | 1,469 | 22 | **0.7528** | 0.0463 | **0.9000** |
| AD | 1995 | 61 | 17 | 270 | 44 | **0.2787** | 0.0630 | **0.5500** | 43 | 2,667 | 18 | **0.7049** | 0.0165 | **0.7895** |
| schizophrenia | 1997 | 92 | 44 | 78 | 48 | **0.4783** | 0.5641 | **0.5789** | 73 | 1,703 | 19 | **0.7935** | 0.0429 | **0.8500** |

Notes: TP – True positives; FP – False positives; FN – False negatives; R – Recall; P – Precision; P@20 – Precision at top 20 predictions.
