# Supplementary material for: SKiM - A generalized literature-based discovery system for uncovering novel biomedical knowledge from PubMed
Source: Research Square preprint supplement (doi:10.21203/rs.3.rs-90043/v1), 2020-11-09
Supplement: Supplementary file 16 [file 982d2e590079983b3ad383a2.docx]

**Table 4.** SKiM predictions prior to validation by clinical trials

| **Disease (A)** | **Cut-off date (a)** | **Drug (C)** | **First Clinical trial** | | **Prior prediction (in years) (b-a)** |
| --- | --- | --- | --- | --- | --- |
| **PMID** | **Year (b)** |
| **Expert curated DDA** | | | | | |
| RD | 1985 | Fluoxetine | 11561116 | 2001 | 16 |
| Pentoxifylline | 2662829 | 1989 | 4 |
| migraine | 1987 | Atorvastatin Calcium | 29746282 | 2018 | 31 |
| Butalbital; Propofol | 22103635; 23020264 | 2012 | 25 |
| Sertraline | 21532361 | 2011 | 24 |
| Nortriptylin | 20069203 | 2009 | 22 |
| Oxcarbazepine | 18268247 | 2008 | 21 |
| Diphenhydramine | 16732839 | 2006 | 19 |
| Melatonin | 15326268 | 2004 | 17 |
| Ergot alkaloids | 12946550 | 2003 | 16 |
| Droperidol; Ubidecarenone | 11781912; 11972582 | 2002 | 15 |
| Isometheptene | 11318886 | 2001 | 14 |
| Valproic acid; Montelukast | 11125749; 10759916 | 2000 | 13 |
| Phenelzine | 8573662 | 1995 | 8 |
| Meperidine; Flurbiprofen | 8294195; 8443934 | 1993 | 6 |
| Bisoprolol; Ketorolac | 1351025; 1497157 | 1992 | 5 |
| Butorphanol; Magnesium | 2020612; 1840336 | 1991 | 4 |
| Lidocaine; Lithium carbonate | 2221511; 2205598 | 1990 | 3 |
| Ibuprofen; Pentobarbital | 2676908; 2497984 | 1989 | 2 |
| AD | 1995 | Vitamin B12 | 29558759 | 2017 | 22 |
| Lithium | 21525519 | 2011 | 16 |
| Ibuprofen | 19324592 | 2009 | 14 |
| Acetylcholine; Androgens; Folic acid; Niacin | 12637119; 12809076; 12967058; 12707064 | 2003 | 8 |
| Nicotine; Mifepristone | 15259398; 12011303 | 2002 | 7 |
| Clioquinol; Fluvoxamine; Paroxetine | 11598313; 11225688; 11739067 | 2001 | 6 |
| Trazodone | 11087767 | 2000 | 5 |
| Rivastigmine; Melatonin; Memantine | 10066203; 10085474; 10885864 | 1999 | 4 |
| Tocopherols | 9110909 | 1997 | 2 |
| Ginkgo biloba extract 761 | 8741021 | 1996 | 1 |
| schizophrenia | 1997 | Clonidine | 22750632 | 2013 | 16 |
| Cannabidiol | 22832859 | 2012 | 15 |
| Valproic acid | 19946935 | 2009 | 12 |
| Iloperidone | 18334909 | 2008 | 11 |
| Paliperidone | 17092691 | 2007 | 10 |
| Perospirone | 15159697 | 2004 | 7 |
| Dehydroepiandrosterone | 12578430 | 2003 | 6 |
| Aripiprazole; Eicosapentaenoic acid | 12363115; 12051959 | 2002 | 5 |
| Procyclidine | 11351929 | 2001 | 4 |
| Lamotrigine | 10711913 | 2000 | 3 |
| Cyproheptadine; Glutamic acid | 10319907; 9894577 | 1999 | 2 |
| Sertraline; Ziprasidone | 9783350; 9690695 | 1998 | 1 |
| **New potential drugs from top 20 predictions** | | | | | |
| RD | 1985 | Atenolol | 2542629 | 1989 | 4 |
| migraine | 1987 | Antiepileptic agents | 11903524 | 2001 | 14 |
| Adofen | 1551787 | 1992 | 5 |
| Sodium valproate | 1576648 | 1992 | 5 |
| AD | 1995 | Metformin | 28538088 | 2017 | 22 |
| Cod liver oil | 17030655 | 2006 | 11 |
| Dextrose, anhydrous | 12821730 | 2003 | 8 |
| schizophrenia | 1997 | Paroxetine Hcl | 9472836 | 1998 | 1 |
